# Supplementary material for: Clinical Phenotype and Outcome of Hypertrophic Cardiomyopathy Associated With Thin-Filament Gene Mutations
Source: PubMed Central journal article supplement (PMC4270453; doi:10.1016/j.jacc.2014.09.059), 2014-12-23
Supplement: mmc1.pdf [file mmc1.pdf]

**Supplementary Table 1: mutational analysis of thin filament patients**

| Pt. ID | Gene  | C  | gNomen             | Transcript    | cNomen       | Exon/Intron | pNomen      | Novelty                          | db SNP | Classification    | Fam. Segregation | N conservation | AA conservation | AA wt           | AA mut          | Grant ham score | AGV GD class | SIFT (score)                   | POLYPHEN (score)          | Other Publications                                                              |
|--------|-------|----|--------------------|---------------|--------------|-------------|-------------|----------------------------------|--------|-------------------|------------------|----------------|-----------------|-----------------|-----------------|-----------------|--------------|--------------------------------|---------------------------|---------------------------------------------------------------------------------|
| 1      | TNNT2 | 1  | g.199601049C>T     | NM_00101430.1 | c.274C>T     | 9           | p.Arg92Trp  | Moolman (1997) J Am Coll Cardiol | no     | pathogenic        | -                | Highly (1.0)   | Highly          | basic           | hydropobic      | 101             | C0           | affect protein function (0.00) | probably damaging (1.000) | Revera(2008) Cardioasc R Pasquale (2011) Circ cardiovascular Gen                |
| 2      | TNNT2 | 1  | g.199601048G>A     | NM_00101430.1 | c.275G>A     | 9           | p.Arg92Gln  | Thierfelder (1994) Cell          | no     | pathogenic        | -                | Highly (1.0)   | Highly          | basic           | polar uncharged | 43              | C0           | affect protein function (0.00) | probably damaging (1.000) | Yanaga (1999) J Biol Chem Watkins H (1995) NEJM Torricelli F, Am J Cardiol 2003 |
| 3      | TNNT2 | 1  | g.199600120C>T     | NM_00101430.1 | c.388C>T     | 11          | p.Arg130Cys | Toricelli F, Am J Cardiol 2003   | no     | pathogenic        | -                | Highly (0.9)   | Highly          | basic           | hydropobic      | 180             | C65          | affect protein function (0.00) | probably damaging (1.000) | Song L (2005) Clin Chim Acta                                                    |
| 4      | TNNT2 | 1  | g.199600120C>T     | NM_00101430.1 | c.388C>T     | 11          | p.Arg130Cys | Toricelli F, Am J Cardiol 2003   | no     | pathogenic        | -                | Highly (0.9)   | Highly          | basic           | hydropobic      | 180             | C65          | affect protein function (0.00) | probably damaging (1.000) | Song L (2005) Clin Chim Acta                                                    |
| 5      | TNNT2 | 1  | g.199600993T>G     | NM_00101430.1 | c.330T>G     | 10          | p.Phe110Leu | Toricelli F, Am J Cardiol 2003   | no     | pathogenic        | yes              | Highly (1.0)   | Highly          | hydrophobic     | hydropobic      | 22              | C0           | tolerated (0.77)               | probably damaging (1.000) | Tao Q (2007) Journal of Clinical Rehabilitative Tissue Engineering Research     |
| 6      | TNNT2 | 1  | g.199594996C>T     | NM_00101430.1 | c.832C>T     | 17          | p.Arg278Cys | Watkins (1995) N Engl J Med      | yes    | pathogenic        | yes              | Highly (1.0)   | Weakly          | basic           | hydropobic      | 180             | C0           | affect protein function (0.00) | probably damaging (1.000) | Yanaga (1999) J Biol Chem Pasquale (2011) Circ cardiovascular Gen               |
| 7      | TNNT2 | 1  | g.199601049C>T     | NM_00101430.1 | c.274C>T     | 10          | p.Arg92Trp  | Moolman (1997) J Am Coll Cardiol | no     | pathogenic        | -                | Highly (1.0)   | Highly          | basic           | hydropobic      | 101             | C0           | affect protein function (0.00) | probably damaging (1.000) | Revera(2008) Cardioasc R Pasquale (2011) Circ CV Gen                            |
| 8      | TNNT2 | 1  | g.199599128_130del | NM_00101430.1 | c.487_489del | 12          | p.Glu163del | Richard P (2003) Circulation     | no     | pathogenic        | -                | -              | -               | -               | -               | -               | -            | -                              | -                         | Millat (2010) Eur J Med Genet.                                                  |
| 9      | TNNT2 | 1  | g.199594996C>T     | NM_00101430.1 | c.832C>T     | 17          | p.Arg278Cys | Watkins (1995) N Engl J Med      | yes    | pathogenic        | yes              | Highly (1.0)   | Weakly          | basic           | hydropobic      | 180             | C0           | affect protein function (0.00) | probably damaging (1.000) | Yanaga (1999) J Biol Chem Pasquale (2011) Circ CV Gen                           |
| 10     | TNNT2 | 1  | g.199600993T>G     | NM_00101430.1 | c.330T>G     | 10          | p.Phe110Leu | Toricelli F, Am J Cardiol 2003   | no     | pathogenic        | yes              | Highly (1.0)   | Highly          | hydrophobic     | hydropobic      | 22              | C0           | tolerated (0.77)               | probably damaging (1.000) | Tao Q (2007) Journal of Clinical Rehabilitative Tissue Engineering Research     |
| 11     | TNNT2 | 1  | g.199600993T>G     | NM_00101430.1 | c.330T>G     | 10          | p.Phe110Leu | Toricelli F, Am J Cardiol 2003   | no     | pathogenic        | yes              | Highly (1.0)   | Highly          | hydrophobic     | hydropobic      | 22              | C0           | tolerated (0.77)               | probably damaging (1.000) | Tao Q (2007) Journal of Clinical Rehabilitative Tissue Engineering Research     |
| 12     | TNNT2 | 1  | g.199600120C>T     | NM_00101430.1 | c.388C>T     | 11          | p.Arg130Cys | Toricelli F, Am J Cardiol 2003   | no     | pathogenic        | -                | Highly (0.9)   | Highly          | basic           | hydropobic      | 180             | C65          | affect protein function (0.00) | probably damaging (1.000) | Song L (2005) Clin Chim Acta                                                    |
| 13     | TNNT2 | 1  | g.199600120C>T     | NM_00101430.1 | c.388C>T     | 11          | p.Arg130Cys | Toricelli F, Am J Cardiol 2003   | no     | pathogenic        | -                | Highly (0.9)   | Highly          | basic           | hydropobic      | 180             | C65          | affect protein function (0.00) | probably damaging (1.000) | Song L (2005) Clin Chim Acta                                                    |
| 14     | TNNT2 | 1  | g.199601049C>T     | NM_00101430.1 | c.274C>T     | 9           | p.Arg92Trp  | Moolman (1997) J Am Coll Cardiol | no     | pathogenic        | -                | Highly (1.0)   | Highly          | basic           | hydropobic      | 101             | C0           | affect protein function (0.00) | probably damaging (1.000) | Revera(2008) Cardioasc R Pasquale (2011) Circ CV Gen                            |
| 15     | TNNT2 | 1  | g.199594972G>A     | NM_00101430.1 | c.856C>T     | 17          | p.Arg286Cys | Richard P (2003)Circulation      | no     | pathogenic        | yes              | Highly (1.0)   | Moderately      | basic           | polar uncharged | 180             | C0           | affect protein function (0.00) | probably damaging (1.000) | Miliou (2005) Heart                                                             |
| 16     | TNNT2 | 1  | g.199601048G>A     | NM_00101430.1 | c.275G>A     | 9           | p.Arg92Gln  | Thierfelder (1994) Cell          | no     | pathogenic        | -                | Highly (1.0)   | Highly          | basic           | polar uncharged | 43              | C0           | affect protein function (0.00) | probably damaging (1.000) | Yanaga (1999) J Biol Chem Watkins H (1995) NEJM Torricelli F, Am J Cardiol 2003 |
| 17     | TNNT2 | 1  | g.199594972G>A     | NM_00101430.1 | c.856C>T     | 17          | p.Arg286Cys | Richard P (2003)Circulation      | no     | pathogenic        | yes              | Highly (1.0)   | Moderately      | basic           | polar uncharged | 180             | C0           | affect protein function (0.00) | probably damaging (1.000) | Miliou (2005) Heart                                                             |
| 18     | TNNI3 | 19 | g.55663278C>T      | NM_000363.4   | c.557G>A     | 8           | p.Arg186Gln | Richard P (2003)Circulation      | no     | pathogenic        | yes              | Weakly (0.0)   | Highly          | basic           | polar uncharged | 43              | C0           | tolerated (0.07)               | possibly damaging (0.899) | Mogensen J (2004)J Am Coll Cardiol.                                             |
| 19     | TNNI3 | 19 | g.60355066A>G      | NM_000363.4   | c.581A>G     | 8           | p.Asn194Ser | yes                              | no     | likely pathogenic | ?                | Highly (1.0)   | Highly          | polar uncharged | polar uncharged | 46              | C0           | affect protein function (0.00) | probably damaging (0.993) |                                                                                 |
| 20     | TNNI3 | 19 | g.60357210G>T      | NM_000363.4   | c.549G>T     | 7           | p.Lys183Asn | yes                              | no     | likely pathogenic | ?                | Highly (1.0)   | Moderately      | basic           | polar uncharged | 94              | C0           | affect protein function (0.00) | possibly damaging (0.902) |                                                                                 |
| 21     | TNNI3 | 19 | g.60357210G>T      | NM_000363.4   | c.549G>T     | 7           | p.Lys183Asn | yes                              | no     | likely pathogenic | ?                | Highly (1.0)   | Moderately      | basic           | polar uncharged | 94              | C0           | affect protein function (0.00) | possibly damaging (0.902) |                                                                                 |

| Pt. ID | Gene  | C  | gNomen          | Transcript      | cNomen   | Exon/ Intron | pNomen      | Novelty                                    | db SNP | Classification    | Fam. Segregation | N conservation | AA conservation | AA wt           | AA mut          | Grant ham score | AGV GD class     | SIFT (score)                   | POLYPHEN (score)          | Other Publications                                    |
|--------|-------|----|-----------------|-----------------|----------|--------------|-------------|--------------------------------------------|--------|-------------------|------------------|----------------|-----------------|-----------------|-----------------|-----------------|------------------|--------------------------------|---------------------------|-------------------------------------------------------|
| 22     | TNNI3 | 19 | g.6035723 3G>A  | NM_0003 63.4    | c.526G>A | 7            | p.Val176Met | yes                                        | no     | likely pathogenic | ?                | Highly (1.0)   | Highly          | hydrophobic     | hydropobic      | 21              | C0               | affect protein function (0.00) | probably damaging (0.964) |                                                       |
| 23     | TNNI3 | 19 | g.6035506 6A>G  | NM_0003 63.4    | c.592C>G | 8            | p.Leu198Val | Merk, Seidman et al. (2005) Cardiogenomics | no     | pathogenic        | -                | Weakly (0.0)   | Highly          | hydrophobic     | hydropobic      | 32              | C0               | affect protein function (0.00) | possibly damaging (0.767) | Morita (2002). Cold Spring Harb Symp Quant Biol.      |
| 24     | TNNI3 | 19 | g.6035506 6A>G  | NM_0003 63.4    | c.620A>C | 8            | p.Lys207Thr | yes                                        | no     | likely pathogenic | yes              | Highly (1.0)   | Highly          | basic           | polar uncharged | 78              | C0               | affect protein function (0.00) | possibly damaging (0.895) |                                                       |
| 25     | TNNI3 | 19 | g.6035506 6A>G  | NM_0003 63.4    | c.592C>G | 8            | p.Leu198Val | Merk, Seidman et al. (2005) Cardiogenomics | no     | pathogenic        | -                | Weakly (0.0)   | Highly          | hydrophobic     | hydropobic      | 32              | C0               | affect protein function (0.00) | possibly damaging (0.767) | Morita (2002). Cold Spring Harb Symp Quant Biol.      |
| 26     | TPM1  | 15 | g.6114338 5T>C  | NM_0010 18005.1 | c.842T>C | 9            | p.Met281Thr | yes                                        | no     | likely pathogenic | yes              | Highly (1.0)   | Weakly          | hydrophobic     | polar uncharged | 81              | C45              | affect protein function (0.01) | benign (0.024)            |                                                       |
| 27     | TPM1  | 15 | g.6114338 5T>C  | NM_0010 18005.1 | c.842T>C | 9            | p.Met281Thr | yes                                        | no     | likely pathogenic | yes              | Highly (1.0)   | Weakly          | hydrophobic     | polar uncharged | 81              | C45              | affect protein function (0.01) | benign (0.024)            |                                                       |
| 28     | ACTC1 | 15 | g.3287423 5T>C  | NM_0051 59.4    | c.67T>C  | 2            | p.Phe23Leu  | yes                                        | no     | likely pathogenic | yes              | Highly (1.0)   | Highly          | hydrophobic     | hydropobic      | 22              | C15              | affect protein function (0.00) | benign (0.231)            |                                                       |
| 29     | ACTC1 | 15 | g.3287423 5T>C  | NM_0051 59.4    | c.67T>C  | 2            | p.Phe23Leu  | yes                                        | no     | likely pathogenic | yes              | Highly (1.0)   | Highly          | hydrophobic     | hydropobic      | 22              | C15              | affect protein function (0.00) | benign (0.231)            |                                                       |
| 30     | ACTC1 | 15 | g.3287077 9C>T  | NM_0051 59.4    | c.818C>T | 6            | p.Ser273Phe | yes                                        | no     | likely pathogenic | ?                | Highly (1.0)   | Highly          | polar uncharged | hydropobic      | 155             | C25              | affect protein function (0.00) | possibly damaging (0.933) |                                                       |
| 31     | TNNT2 | 1  | g.1996010 49C>T | NM_0010 01430.1 | c.274C>T | 9            | p.Arg92Trp  | Moolman (1997) J Am Coll Cardiol           | no     | pathogenic        | -                | Highly (1.0)   | Highly          | basic           | hydropobic      | 101             | C0               | affect protein function (0.00) | probably damaging (1.000) | Revera(2008) Cardiovasc R Pasquale (2011) Circ CV Gen |
| 32     | TNNT2 | 1  | g.1996010 49C>T | NM_0010 01430.1 | c.274C>T | 9            | p.Arg92Trp  | Moolman (1997) J Am Coll Cardiol           | no     | pathogenic        | -                | Highly (1.0)   | Highly          | basic           | hydropobic      | 101             | C0               | affect protein function (0.00) | probably damaging (1.000) | Revera(2008) Cardiovasc R Pasquale (2011) Circ CV Gen |
| 33     | TPM1  | 15 | g.6333508 6G>A  | NM_0010 18005.1 | c.58G>A  | 1            | p.Asp20Asn  | yes                                        | no     | likely pathogenic | -                | Highly (1.0)   | Highly          | acidic          | polar uncharged | 23              | C15              | affect protein function (0.00) | benign (0.019)            |                                                       |
| 34     | TPM1  | 15 | g.6335442 9G>A  | NM_0010 18005.1 | c.655G>A | 7            | p.Asp219Asn | yes                                        | no     | likely pathogenic | -                | Highly (1.0)   | Highly          | acidic          | polar uncharged | 23              | C15              | affect protein function (0.00) | benign (0.104)            |                                                       |
| 35     | TNNT2 | 1  | g.1995954 10T>C | NM_0010 01430.1 | c.785A>G | 16           | p.Asn262Ser | yes                                        | no     | likely pathogenic |                  | Highly (1.0)   | Moderately      | polar uncharged | 46              | C0              | tolerated (0.21) | possibly damaging              |                           |                                                       |
| 36     | TNNT2 | 1  | g.1995954 10T>C | NM_0010 01430.1 | c.785A>G | 16           | p.Asn262Ser | yes                                        | no     | likely pathogenic |                  | Highly (1.0)   | Moderately      | polar uncharged | 46              | C0              | tolerated (0.21) | possibly damaging              |                           |                                                       |
| 37     | TNNI3 | 19 | g.5566546 2C>G  | NM_0003 63.4    | c.485G>C | 7            | p.Arg162Pro | Richard P (2003) Circulation               | no     | pathogenic        | yes              | Moderately     | Moderately      | basic           | hydropobic      | 103             | C0               | affect protein function (0.00) | possibly damaging (1.804) | Doolan (2005) JMCC Ingles J (2005) J Med Genet        |
| 38     | TNNT2 | 1  | g.1995949 96C>T | NM_0010 01430.1 | c.832C>T | 17           | p.Arg278Cys | Watkins (1995) N Engl J Med                | yes    | pathogenic        | yes              | Highly (1.0)   | Weakly          | basic           | hydropobic      | 180             | C0               | affect protein function (0.00) | probably damaging (1.000) | Yanaga (1999) J Biol Chem Pasquale (2011) Circ CV Gen |
| 39     | TNNT2 | 1  | g.1995949 72G>A | NM_0010 01430.1 | c.856C>T | 17           | p.Arg286Cys | Richard P (2003)Circulation                | no     | pathogenic        | yes              | Highly (1.0)   | Moderately      | basic           | polar uncharged | 180             | C0               | affect protein function (0.00) | probably damaging (1.000) | Miliou (2005) Heart                                   |
| 40     | TNNT2 | 1  | g.1995949 96C>T | NM_0010 01430.1 | c.832C>T | 17           | p.Arg278Cys | Watkins (1995) N Engl J Med                | yes    | pathogenic        | yes              | Highly (1.0)   | Weakly          | basic           | hydropobic      | 180             | C0               | affect protein function (0.00) | probably damaging (1.000) | Yanaga (1999) J Biol Chem Pasquale (2011) Circ CV Gen |
| 41     | TNNT2 | 1  | g.1995949 96C>T | NM_0010 01430.1 | c.832C>T | 17           | p.Arg278Cys | Watkins (1995) N Engl J Med                | yes    | pathogenic        | yes              | Highly (1.0)   | Weakly          | basic           | hydropobic      | 180             | C0               | affect protein function (0.00) | probably damaging (1.000) | Yanaga (1999) J Biol Chem Pasquale (2011) Circ CV Gen |
| 42     | TNNT2 | 1  | g.1996010 42C>T | NM_0010 01430.1 | c.281G>A | 10           | p.Arg94His  | yes                                        | no     | likely pathogenic | ?                | Highly (1.0)   | Highly          | basic           | basic           | 29              | C0               | tolerated (0.33)               | probably damaging (1.000) |                                                       |

| Pt. ID | Gene  | C  | gNomen                     | Transcript      | cNomen       | Exon/ Intron | pNomen      | Novelty                                    | db SNP | Classification    | Fam. Segregation | N conservation | AA conservation | AA wt           | AA mut          | Grant ham score | AGV GD class | SIFT (score)                   | POLYPHEN (score)          | Other Publications                                                              |
|--------|-------|----|----------------------------|-----------------|--------------|--------------|-------------|--------------------------------------------|--------|-------------------|------------------|----------------|-----------------|-----------------|-----------------|-----------------|--------------|--------------------------------|---------------------------|---------------------------------------------------------------------------------|
| 43     | TNNT2 | 1  | g.1995953 88G>C            | NM_0010 01430.1 | c.807C>G     | 16           | p.Asn269Lys | Heba(2013) J. Cardiovasc. Trans. Res       | no     | likely pathogenic | ?                | Highly (1.0)   | Weakly          | polar uncharged | basic           | 94              | C0           | tolerated (1.00)               | benign (0.048)            |                                                                                 |
| 44     | TNNI3 | 19 | g.5566551 4G>A             | NM_0003 63.4    | c.433C>T     | 7            | p.Arg145Trp | Mogensen J (2004) J Am Coll Cardiol        | yes    | pathogenic        | yes              | Weakly (0.0)   | Moderately      | basic           | hydropobic      | 101             | C0           | affect protein function (0.00) | probably damaging (1.000) | Cheng (2005) J Am Coll Card van den Wijngaard (2011) Neth Heart J               |
| 45     | TNNI3 | 19 | g.5566551 4G>A             | NM_0003 63.4    | c.433C>T     | 7            | p.Arg145Trp | Mogensen J (2004) J Am Coll Cardiol        | yes    | pathogenic        | yes              | Weakly (0.0)   | Moderately      | basic           | hydropobic      | 101             | C0           | affect protein function (0.00) | probably damaging (1.000) | Cheng (2005) J Am Coll Card van den Wijngaard (2011) Neth Heart J               |
| 46     | TNNI3 | 19 | g.5566546 2C>T             | NM_0003 63.4    | c.485G>A     | 7            | p.Arg162Gln | Van Driest SL (2003) Circulation           | no     | pathogenic        | -                | Moderately     | Moderately      | basic           | polar uncharged | 43              | C0           | tolerated (0.11)               | possibly damaging (0.768) | Mogensen(2004) JACC Cheng (2005) JACC                                           |
| 47     | TPM1  | 15 | g.6335392 2G>A             | NM_0010 18005.1 | c.574G>A     | 9            | p.Glu192Lys | Probst S (2011) Circ CardiovascGenet       | yes    | pathogenic        | -                | Highly (1.0)   | Highly          | acidic          | basic           | 56              | C55          | affect protein function (0.00) | benign (0.013)            | Probst (2001) Circ Cardiovasc Gen                                               |
| 48     | TNNT2 | 1  | g.1996013 89A>T            | NM_0010 01430.1 | c.236T>A     | 9            | p.Ile79Asn  | Watkins (1995) N Engl J Med                | no     | pathogenic        | yes              | Highly (1.0)   | Highly          | hydrophobic     | polar uncharged | 149             | C0           | tolerated (0.12)               | probably damaging (1.000) | Palm (2001) Biophys J Varnava (2001) Circulation Pasquale (2011) Circ CV Gen    |
| 49     | TNNT2 | 1  | g.1996013 89A>T            | NM_0010 01430.1 | c.236T>A     | 9            | p.Ile79Asn  | Watkins (1995) N Engl J Med                | no     | pathogenic        | yes              | Highly (1.0)   | Highly          | hydrophobic     | polar uncharged | 149             | C0           | tolerated (0.12)               | probably damaging (1.000) | Palm (2001) Biophys J Varnava (2001) Circulation Pasquale (2011) Circ CV Gen    |
| 50     | TNNT2 | 1  | g.1996010 48G>A            | NM_0010 01430.1 | c.275G>A     | 9            | p.Arg92Gln  | Thierfelder (1994) Cell                    | no     | pathogenic        | -                | Highly (1.0)   | Highly          | basic           | polar uncharged | 43              | C0           | affect protein function (0.00) | probably damaging (1.000) | Yanaga (1999) J Biol Chem Watkins H (1995) NEJM Torricelli F, Am J Cardiol 2003 |
| 51     | TNNI3 | 19 | g.5566546 2C>T             | NM_0003 63.4    | c.485G>A     | 7            | p.Arg162Gln | Van Driest SL (2003) Circulation           | no     | pathogenic        | -                | Moderately     | Moderately      | basic           | polar uncharged | 43              | C0           | tolerated (0.11)               | possibly damaging (0.768) | Mogensen(2004) JACC Cheng (2005) JACC                                           |
| 52     | TNNT2 | 1  | g.1995991 28_19959 9130del | NM_0010 01430.1 | c.487_489del | 12           | p.Glu163del | Richard P (2003) Circulation               | no     | pathogenic        | -                | -              | -               | -               | -               | -               | -            | -                              | -                         | Millat (2010) Eur J M Genet. Pasquale (2011) Circ CV Gen                        |
| 53     | TNNT2 | 1  | g.1996013 68T>G            | NM_0010 01430.1 | c.257A>C     | 9            | p.Asp86Ala  | Van Driest SL (2003) Circulation           | no     | pathogenic        | -                | Highly (1.0)   | Highly          | acidic          | hydropobic      | 126             | C65          | affect protein function (0.00) | probably damaging (1.000) | Bos (2014) Mayo Clin Proc                                                       |
| 54     | TNNT2 | 1  | g.1996013 89A>T            | NM_0010 01430.1 | c.236T>A     | 9            | p.Ile79Asn  | Watkins (1995) N Engl J Med                | no     | pathogenic        | yes              | Highly (1.0)   | Highly          | hydrophobic     | polar uncharged | 149             | C0           | tolerated (0.12)               | probably damaging (1.000) | Palm (2001) Biophys J Varnava (2001) Circulation Pasquale (2011) Circ CV Gen    |
| 55     | TNNT2 | 1  | g.1995949 72G>A            | NM_0010 01430.1 | c.856C>T     | 17           | p.Arg286Cys | Richard P (2003)Circulation                | no     | pathogenic        | yes              | Highly (1.0)   | Moderately      | basic           | polar uncharged | 180             | C0           | affect protein function (0.00) | probably damaging (1.000) | Miliou (2005) Heart                                                             |
| 56     | TNNT2 | 1  | g.1995949 72G>A            | NM_0010 01430.1 | c.856C>T     | 17           | p.Arg286Cys | Richard P (2003)Circulation                | no     | pathogenic        | yes              | Highly (1.0)   | Moderately      | basic           | polar uncharged | 180             | C0           | affect protein function (0.00) | probably damaging (1.000) | Miliou (2005) Heart                                                             |
| 57     | TNNI3 | 19 | g.5566552 5C>T             | NM_0003 63.4    | c.422G>A     | 7            | p.Arg141Gln | Richard P (2003) Circulation               | no     | pathogenic        | -                | Weakly (0.0)   | Moderately      | basic           | polar uncharged | 43              | C0           | tolerated (0.05)               | probably damaging (0.975) | Mogensen(2004) JACC Van Driest (2003) Circulation Bos (2014) Mayo Clin Proc     |
| 58     | TNNI3 | 19 | g.5566547 7G>A             | NM_0003 63.4    | c.470C>T     | 7            | p.Ala157Val | Richard P (2003) Circulation               | no     | pathogenic        | -                | Moderately     | Moderately      | hydrophobic     | hydropobic      | 64              | C0           | tolerated (0.20)               | possibly damaging (0.860) | Mogensen(2004) JACC Bos (2014) Mayo Clin Proc                                   |
| 59     | ACTC1 | 15 | g.3508440 4G>A             | NM_0051 59.4    | c.695C>T     | 5            | p.Ala232Val | yes                                        | no     | likely pathogenic | -                | Highly (1.0)   | Highly          | hydrophobic     | hydropobic      | 64              | C65          | affect protein function (0.00) | possibly damaging (0.911) |                                                                                 |
| 60     | TNNT2 | 1  | g.1996009 93T>G            | NM_0010 01430.1 | c.330T>G     | 10           | p.Phe110Leu | Toricelli F, Am J Cardiol 2003             | no     | pathogenic        | yes              | Highly (1.0)   | Highly          | hydrophobic     | hydropobic      | 22              | C0           | tolerated (0.77)               | probably damaging (1.000) | Tao Q (2007) Journal of Clinical Rehabilitative Tissue Engineering Research     |
| 61     | TPM1  | 15 | g.6335392 2G>A             | NM_0010 18005.1 | c.574G>A     | 9            | p.Glu192Lys | Merk, Seidman et al. (2005) Cardiogenomics | yes    | pathogenic        | -                | Highly (1.0)   | Highly          | acidic          | basic           | 56              | C55          | affect protein function (0.00) | benign (0.013)            | Probst S (2011) Circ Cardiovasc Genet                                           |
| 62     | TNNI3 | 19 | g.5566850 9A>T             | NM_0003 63.4    | c.25-8T>A    | IVS3         | p.?         | Kimura A (1997) Nat Genetics               | yes    | pathogenic        | -                | -              | -               | -               | -               | -               | -            | -                              | -                         | Murakami C (2010) Leg Med (Tokyo)                                               |
| 63     | TNNI3 | 19 | g.5566546 2C>T             | NM_0003 63.4    | c.485G>A     | 7            | p.Arg162Gln | Van Driest SL (2003) Circulation           | no     | pathogenic        | -                | Moderately     | Moderately      | basic           | polar uncharged | 43              | C0           | tolerated (0.11)               | possibly damaging (0.768) | Mogensen(2004) JACC Doolan (2005) JMCC Ingles J (2005) J Med Genet              |

| Pt. ID | Gene  | C  | gNomen          | Transcript      | cNomen     | Exon/ Intron | pNomen           | Novelty                         | db SNP | Classification    | Fam. Segregation | N conservation | AA conservation | AA wt           | AA mut          | Grantham score | AGV GD class | SIFT (score)                   | POLYPHEN (score)          | Other Publications                                                          |
|--------|-------|----|-----------------|-----------------|------------|--------------|------------------|---------------------------------|--------|-------------------|------------------|----------------|-----------------|-----------------|-----------------|----------------|--------------|--------------------------------|---------------------------|-----------------------------------------------------------------------------|
| 64     | TNNI3 | 19 | g.5566850 9A>T  | NM_0003 63.4    | c.25-8T>A  | IVS3         | p.?              | Kimura A (1997) Nat Genetics    | yes    | pathogenic        | -                | -              | -               | -               | -               | -              | -            | -                              | -                         | Murakami C (2010) Leg Med (Tokyo)                                           |
| 65     | TNNI3 | 19 | g.5566850 9A>T  | NM_0003 63.4    | c.25-8T>A  | IVS3         | p.?              | Kimura A (1997) Nat Genetics    | yes    | pathogenic        | -                | -              | -               | -               | -               | -              | -            | -                              | -                         | Murakami C (2010) Leg Med (Tokyo)                                           |
| 66     | TNNI3 | 19 | g.5566850 9A>T  | NM_0003 63.4    | c.25-8T>A  | IVS3         | p.?              | Kimura A (1997) Nat Genetics    | yes    | pathogenic        | -                | -              | -               | -               | -               | -              | -            | -                              | -                         | Murakami C (2010) Leg Med (Tokyo)                                           |
| 67     | TNNT2 | 1  | g.1996009 93T>G | NM_0010 01430.1 | c.330T>G   | 10           | p.Phe110Leu      | Torricelli F, Am J Cardiol 2003 | no     | pathogenic        | yes              | Highly (1.0)   | Highly          | hydrophobic     | hydrophobic     | 22             | C0           | tolerated (0.77)               | probably damaging (1.000) | Tao Q (2007) Journal of Clinical Rehabilitative Tissue Engineering Research |
| 68     | TNNT2 | 1  | g.1995991 58C>T | NM_0010 01430.1 | c.460-1G>A | IVS11        | p.?              | yes                             | no     | likely pathogenic | -                | -              | -               | -               | -               | -              | -            | -                              | -                         |                                                                             |
| 69     | TPM1  | 15 | g.6333509 2G>A  | NM_0010 18005.1 | c.64G>A    | 1            | p.Ala22Thr       | yes                             | no     | likely pathogenic | -                | Highly (1.0)   | Highly          | hydrophobic     | polar uncharged | 58             | C55          | affect protein function (0.00) | probably damaging (1.000) |                                                                             |
| 70     | TNNI3 | 19 | g.5566546 2C>G  | NM_0003 63.4    | c.485G>C   | 7            | p.Arg162Pro      | Richard P (2003) Circulation    | no     | pathogenic        | yes              | Moderately     | Moderately      | basic           | hydrophobic     | 103            | C0           | affect protein function (0.00) | possibly damaging (1.804) | Doolan (2005) JMCC Ingles J (2005) J Med Genet                              |
| 71     | TNNT2 | 1  | g.1996010 32C>A | NM_0010 01430.1 | c.291G>T   | 10           | p.Lys97Asn       | Maron B (2010) Am J Cardiol     | no     | pathogenic        | -                | Highly (1.0)   | Highly          | basic           | polar uncharged | 94             | C0           | affect protein function (0.00) | probably damaging (1.000) | Seidman (2001) Cardiogenomics                                               |
| 72     | TNNT2 | 1  | g.1995949 96C>T | NM_0010 01430.1 | c.832C>T   | 17           | p.Arg278Cys      | Watkins (1995) N Engl J Med     | yes    | pathogenic        | yes              | Highly (1.0)   | Weakly          | basic           | hydrophobic     | 180            | C0           | affect protein function (0.00) | probably damaging (1.000) | Yanaga (1999) J Biol Chem Pasquale (2011) Circ CV Gen                       |
| 73     | TNNI3 | 19 | g.6035940 5del  | NM_0003 63.4    | c.258del   | 5            | p.Leu88Trpfs X27 | yes                             | no     | likely pathogenic | ?                | Weakly (0.0)   | -               | -               | -               | -              | -            | -                              | -                         |                                                                             |
| 74     | TNNI3 | 19 | g.6035793 7C>A  | NM_0003 63.4    | c.356C>A   | 6            | p.Thr119Asn      | yes                             | no     | likely pathogenic | ?                | Weakly (0.0)   | Moderately      | polar uncharged | polar uncharged | 65             | C0           | affect protein function (0.00) | benign (0.000)            |                                                                             |
| 75     | TNNT2 | 1  | g.1996025 96A>C | NM_0010 01430.1 | c.196A>C   | 7            | p.Lys66Gln       | yes                             | no     | likely pathogenic | yes              | Highly (1.0)   | Weakly          | basic           | polar uncharged | 53             | C0           | tolerated (0.36)               | probably damaging (0.999) |                                                                             |
| 76     | TNNT2 | 1  | g.1995949 96C>T | NM_0010 01430.1 | c.832C>T   | 17           | p.Arg278Cys      | Watkins (1995) N Engl J Med     | yes    | pathogenic        | yes              | Highly (1.0)   | Weakly          | basic           | hydrophobic     | 180            | C0           | affect protein function (0.00) | probably damaging (1.000) | Yanaga (1999) J Biol Chem Pasquale (2011) Circ CV Gen                       |
| 77     | TNNT2 | 1  | g.1995949 96C>T | NM_0010 01430.1 | c.832C>T   | 17           | p.Arg278Cys      | Watkins (1995) N Engl J Med     | yes    | pathogenic        | yes              | Highly (1.0)   | Weakly          | basic           | hydrophobic     | 180            | C0           | affect protein function (0.00) | probably damaging (1.000) | Yanaga (1999) J Biol Chem Pasquale (2011) Circ CV Gen                       |
| 78     | TNNI3 | 19 | g.5566324 9C>T  | NM_0003 63.4    | c.586G>A   | 8            | p.Asp196Asn      | Niimura H (2002) Circulation    | yes    | pathogenic        | -                | Highly (1.0)   | Highly          | acidic          | polar uncharged | 23             | C0           | affect protein function (0.00) | probably damaging (0.995) | Richard (2003) Circulation Mogensen(2004) JACC                              |
| 79     | ACTC1 | 15 | g.3508440 4G>A  | NM_0051 59.4    | c.695C>T   | 5            | p.Ala232Val      | yes                             | no     | likely pathogenic | -                | Highly (1.0)   | Highly          | hydrophobic     | hydrophobic     | 64             | C65          | affect protein function (0.00) | possibly damaging (0.911) |                                                                             |
| 80     | ACTC1 | 15 | g.3508471 1C>T  | NM_0051 59.4    | c.514G>A   | 4            | p.Ala172Thr      | yes                             | no     | likely pathogenic | -                | Highly (1.0)   | Highly          | hydrophobic     | polar uncharged | 58             | C0           | affect protein function (0.00) | probably damaging (0.964) |                                                                             |

**Legend:** Pt.ID= patient identification number; C=chromosome; Novelty=first publication of appearance, "yes" if mutation is previously unpublished; dbSNP= "yes" if variant is present in dbSNP public SNP database; Fam. Segregation= "yes" if familial segregation could be proved in at least one patient of the cohort for a given variant; N conservation= nucleotide conservation among species; AA conservation= aminoacid conservation among species; AA wt= aminoacid present in wild type protein; AA mut= aminoacid present in mutant protein; Grantham score= In silico prediction of pathogenic effect reporting the calculated Grantham Variation, GV, assessing if variation is tolerated (Invariable – conservative → GV=0; Variable – conservative → 0<GV<62; Variable – non-conservative → GV>62); AGVGD Class: Scoring of the variant using Align-GVGD algorithm (see <http://agvgd.iarc.fr/classifiers.php> for output classification); SIFT score: classification of the variant according to Sorting Intolerant from Tolerant (SIFT) algorithm ([http://sift.jcvi.org/www/SIFT\\_help.html#SIFT\\_OUTPUT\\_SUBST](http://sift.jcvi.org/www/SIFT_help.html#SIFT_OUTPUT_SUBST)); POLYPHEN score: classification of the pathogenicity of variant according to Poliphen algorithm (<http://genetics.bwh.harvard.edu/pph/>); Other publications: publications involving description of patients or functional in vitro studies on the variant. All tests were performed using Alamut® software (Interactive Biosoftware, Rouen, France).

## Supplementary Table 2: thick filament mutations

| N pts | Gene   | Mutation                          | Classification       |
|-------|--------|-----------------------------------|----------------------|
| 6     | MYBPC3 | c.3192dup (p.Lys1065GlnfsX12)     | certainly pathogenic |
| 6     | MYBPC3 | c.1505G>A (p.Arg502Gln)           | certainly pathogenic |
| 3     | MYBPC3 | c.2258dup (p.Lys754GlnfsX79)      | certainly pathogenic |
| 3     | MYBPC3 | c.821+1G>A p.?                    | certainly pathogenic |
| 3     | MYBPC3 | c.1624G>C (p.Glu542Gln)           | certainly pathogenic |
| 2     | MYBPC3 | c.1591G>C (p.Gly531Arg)           | certainly pathogenic |
| 2     | MYBPC3 | c.2440_2442del (p.Lys814del)      | certainly pathogenic |
| 2     | MYBPC3 | c.2309-2A>G p.?                   | certainly pathogenic |
| 2     | MYBPC3 | c.2311G>A (p.Val771Met)           | certainly pathogenic |
| 2     | MYBPC3 | c.1468G>A (p.Gly490Arg)           | certainly pathogenic |
| 1     | MYBPC3 | c.772G>A (p.Glu258Lys)            | certainly pathogenic |
| 1     | MYBPC3 | c.2526C>G (p.Tyr842X)             | certainly pathogenic |
| 1     | MYBPC3 | c.3763G>A (p.Ala1255Thr)          | certainly pathogenic |
| 1     | MYBPC3 | c.2429G>A (p.Arg810His)           | certainly pathogenic |
| 1     | MYBPC3 | c.1321G>A (p.Glu441Lys)           | certainly pathogenic |
| 1     | MYBPC3 | c.3005G>A (p.Arg1002Gln)          | certainly pathogenic |
| 1     | MYBPC3 | c.1000G>A (p.Glu334Lys)           | certainly pathogenic |
| 1     | MYBPC3 | c.2905C>T (p.Gln969X)             | certainly pathogenic |
|       |        |                                   |                      |
| 6     | MYH7   | c.1988G>A (p.Arg663His)           | certainly pathogenic |
| 3     | MYH7   | c.2167C>T (p.Arg723Cys)           | certainly pathogenic |
| 3     | MYH7   | c.1954A>G (p.Arg652Gly)           | certainly pathogenic |
| 3     | MYH7   | c.1324C>T (p.Arg442Cys)           | certainly pathogenic |
| 2     | MYH7   | c.1208G>A (p.Arg403Gln)           | certainly pathogenic |
| 2     | MYH7   | c.2779G>A (p.Glu927Lys)           | certainly pathogenic |
| 1     | MYH7   | c.2606G>A (p.Arg869His)           | certainly pathogenic |
| 1     | MYH7   | c.1987C>T (p.Arg663Cys)           | certainly pathogenic |
| 1     | MYH7   | c.4130C>T (p.Thr1377Met)          | certainly pathogenic |
| 1     | MYH7   | c.3158G>A (p.Arg1053Gln)          | certainly pathogenic |
| 1     | MYH7   | c.1193G>A (p.Gly398Glu)           | certainly pathogenic |
| 1     | MYH7   | c.1615A>C (p.Met539Leu)           | certainly pathogenic |
| 1     | MYH7   | c.1358G>A (p.Arg453His)           | certainly pathogenic |
| 1     | MYH7   | c.1816G>A (p.Val606Met)           | certainly pathogenic |
| 1     | MYH7   | c.2156G>A (p.Arg719Gln)           | certainly pathogenic |
| 1     | MYH7   | c.2389G>A (p.Ala797Thr)           | certainly pathogenic |
| 1     | MYH7   | c.2302G>A (p.Gly768Arg)           | certainly pathogenic |
| 1     | MYH7   | c.1063G>A (p.Ala355Thr)           | certainly pathogenic |
| 1     | MYH7   | c.2770G>A (p.Glu924Lys)           | certainly pathogenic |
| 1     | MYH7   | c.809A>G (p.Lys270Arg)            | certainly pathogenic |
| 1     | MYH7   | c.2945T>C (p.Met982Thr)           | certainly pathogenic |
| 1     | MYH7   | c.4377G>T (p.Lys1459Asn)          | certainly pathogenic |
| 1     | MYH7   | c.2080C>T (p.Arg694Cys)           | certainly pathogenic |
|       |        |                                   |                      |
| 3     | MYL2   | c.173G>A (p.Arg58Gln)             | certainly pathogenic |
| 1     | MYL2   | c.484G>A (p.Gly162Arg)            | certainly pathogenic |
|       |        |                                   |                      |
| 5     | MYBPC3 | c.2689_2698del (p.Gly897AlafsX24) | likely pathogenic    |
| 4     | MYBPC3 | c.1112C>G (p.Pro371Arg)           | likely pathogenic    |
| 3     | MYBPC3 | c.1020C>G (p.Tyr340X)             | likely pathogenic    |
| 3     | MYBPC3 | c.1174del (p.Ala392LeufsX14)      | likely pathogenic    |

|   |        |                                    |                   |
|---|--------|------------------------------------|-------------------|
| 2 | MYBPC3 | c.3432_3435dup (p.Phe1147TrpfsX3)  | likely pathogenic |
| 2 | MYBPC3 | c.3767_3769del (p.Thr1256del)      | likely pathogenic |
| 1 | MYBPC3 | c.3551C>A (p.Thr1184Asn)           | likely pathogenic |
| 1 | MYBPC3 | c.3560T>G (p.Leu1187Arg)           | likely pathogenic |
| 1 | MYBPC3 | c.1171del (p.Asp391ThrfsX15)       | likely pathogenic |
| 1 | MYBPC3 | c.3106C>T (p.Arg1036Cys)           | likely pathogenic |
| 1 | MYBPC3 | c.1789C>T (p.Arg597Trp)            | likely pathogenic |
| 1 | MYBPC3 | c.2302_2308del (p.Val768ThrfsX52)  | likely pathogenic |
| 1 | MYBPC3 | c.913_914del (p.Phe305ProfsX27)    | likely pathogenic |
| 1 | MYBPC3 | c.495G>C (p.Glu165Asp)             | likely pathogenic |
| 1 | MYBPC3 | c.649A>G (p.Ser217Gly)             | likely pathogenic |
| 1 | MYBPC3 | c.1471G>A (p.Val491Met)            | likely pathogenic |
| 1 | MYBPC3 | c.2849C>T (p.Ala950Val)            | likely pathogenic |
| 1 | MYBPC3 | c.2728C>A (p.Pro910Thr)            | likely pathogenic |
| 1 | MYBPC3 | c.3617_3618del (p.Gly1206GlufsX35) | likely pathogenic |
| 1 | MYBPC3 | c.2113dup (p.Thr705AsnfsX3)        | likely pathogenic |
| 1 | MYBPC3 | c.2077G>T (p.Ala693Ser)            | likely pathogenic |
| 1 | MYBPC3 | c.2356G>T (p.Asp786Tyr)            | likely pathogenic |
| 1 | MYBPC3 | c.3413G>C (p.Arg1138Pro)           | likely pathogenic |
| 1 | MYBPC3 | c.3811C>T (p.Arg1271X)             | likely pathogenic |
| 1 | MYBPC3 | c.636C>G (p.Ser212Arg)             | likely pathogenic |
| 1 | MYBPC3 | c.1575T>G (p.Tyr525X)              | likely pathogenic |
| 1 | MYBPC3 | c.1574A>C (p.Tyr525Ser)            | likely pathogenic |
| 1 | MYBPC3 | c.818G>A (p.Arg273His)             | likely pathogenic |
| 1 | MYBPC3 | c.1408C>T (p.Arg470Trp)            | likely pathogenic |
| 1 | MYBPC3 | c.2153del (p.Leu718ArgfsX36)       | likely pathogenic |
| 1 | MYBPC3 | c.2429G>T (p.Arg810Leu)            | likely pathogenic |
|   |        |                                    |                   |
| 2 | MYH7   | c.2727C>G (p.Ile909Met)            | likely pathogenic |
| 2 | MYH7   | c.1801C>T (p.Leu601Phe)            | likely pathogenic |
| 2 | MYH7   | c.2788G>C (p.Glu930Gln)            | likely pathogenic |
| 1 | MYH7   | c.4363G>T (p.Glu1455X)             | likely pathogenic |
| 1 | MYH7   | c.2594A>G (p.Lys865Arg)            | likely pathogenic |
| 1 | MYH7   | c.2069T>C (p.Met690Thr)            | likely pathogenic |
| 1 | MYH7   | c.208A>T (p.Thr70Ser)              | likely pathogenic |
| 1 | MYH7   | c.2974C>A (p.Leu992Met)            | likely pathogenic |
| 1 | MYH7   | c.920C>A (p.Pro307His)             | likely pathogenic |
| 1 | MYH7   | c.950A>G (p.Glu317Gly)             | likely pathogenic |
| 1 | MYH7   | c.2893G>A (p.Glu965Lys)            | likely pathogenic |
| 1 | MYH7   | c.1820G>A (p.Gly607Asp)            | likely pathogenic |
| 1 | MYH7   | c.2346C>A (p.Ser782Arg)            | likely pathogenic |
| 1 | MYH7   | c.1871A>G (p.Tyr624Cys)            | likely pathogenic |
| 1 | MYH7   | c.697G>T (p.Ala233Ser)             | likely pathogenic |
| 1 | MYH7   | c.2346C>A (p.Ser782Arg)            | likely pathogenic |
| 1 | MYH7   | c.2707G>C (p.Glu903Gln)            | likely pathogenic |
|   |        |                                    |                   |
| 3 | MYL2   | c.58A>C (p.Met20Leu)               | likely pathogenic |
| 2 | MYL2   | c.401A>C (p.Glu134Ala)             | likely pathogenic |
| 1 | MYL2   | C.304G>A (p.Ala102Thr)             | likely pathogenic |

| <b>Supplementary Table 3</b>                                                 | <b>TNNT2</b> | <b>TNNI3</b> |              |
|------------------------------------------------------------------------------|--------------|--------------|--------------|
| <b>Comparison between patients with TNNT2 and TNNI3 mutations (baseline)</b> | n=43         | n=24         | P Value      |
| <b>Clinical/Demographic features</b>                                         |              |              |              |
| Female                                                                       | 16 (37%)     | 12 (52%)     | 0.439        |
| Age at enrollment (years)                                                    | 43 ± 15      | 47 ± 18      | 0.334        |
| Age at final evaluation (years)                                              | 47 ± 16      | 52 ± 19      | 0.256        |
| Family history of HCM                                                        | 23 (53%)     | 10 (42%)     | 0.447        |
| Family history of sudden cardiac death                                       | 17 (39%)     | 8 (33%)      | 0.793        |
| NYHA functional class                                                        |              |              |              |
| I                                                                            | 31 (72%)     | 14 (58%)     | 0.286        |
| II                                                                           | 9 (21%)      | 7 (29%)      | 0.553        |
| III/IV                                                                       | 3 (7%)       | 3 (13%)      | 0.659        |
| Angina pectoris                                                              | 9 (21%)      | 4 (17%)      | 0.757        |
| Syncope                                                                      | 6 (14%)      | 6 (26%)      | 0.324        |
| Symptomatic                                                                  | 21 (49%)     | 14 (61%)     | 0.611        |
| Atrial fibrillation                                                          | 14 (44%)     | 7 (44%)      | 1.000        |
| Abnormal BP response to exercise                                             | 9 (22%)      | 5 (21%)      | 0.993        |
| Non-sustained ventricular tachycardia                                        | 13 (30%)     | 7 (30%)      | 1.000        |
| Sustained ventricular tachycardia                                            | 2 (5%)       | 2 (10%)      | 0.614        |
| <b>ECG</b>                                                                   |              |              |              |
| T wave inversion                                                             | 27 (69%)     | 12 (67%)     | 0.439        |
| Increased Voltage (LV hypertrophy)                                           | 25 (64%)     | 8 (44%)      | <b>0.043</b> |
| Inferolateral Q waves                                                        | 16 (41%)     | 7 (39%)      | 0.597        |
| LV strain / repolarization abnormalities                                     | 19 (50%)     | 9 (53%)      | 0.617        |
| <b>Echocardiography</b>                                                      |              |              |              |
| Left atrium (mm)                                                             | 43±9         | 44±9         | 0.664        |
| Maximum LV wall thickness (mm)                                               | 21±7         | 19±7         | 0.266        |
| With LV wall thickness > 30mm                                                | 3 (7%)       | 1 (4%)       | 0.633        |
| Maximal thickness site: Septum                                               | 36 (84%)     | 14 (59%)     | <b>0.039</b> |
| Apex/Concentric                                                              | 7 (16%)      | 10 (41%)     | <b>0.038</b> |
| LV End-diastolic diameter (mm)                                               | 45±8         | 42±9         | 0.164        |
| LV End-systolic diameter (mm)                                                | 24±6         | 26±8         | 0.250        |
| LV Ejection fraction (%)                                                     | 66±10        | 65±6         | 0.656        |
| With LV Ejection fraction <50%                                               | 2 (5%)       | 1 (4%)       | 0.290        |
| LVOT Gradient (mmHg)                                                         | 23±38        | 19±25        | 0.645        |
| LVOT Obstruction                                                             | 10 (23%)     | 4 (17%)      | 0.674        |
| Moderate-to-severe mitral regurgitation                                      | 4 (9%)       | 1 (4%)       | 0.647        |
| LV filling pattern                                                           |              |              |              |
| Normal                                                                       | 14 (32%)     | 7 (29%)      | 1.000        |
| Impaired relaxation                                                          | 19 (44%)     | 7 (29%)      | 0.298        |
| Pseudo-normalized                                                            | 8 (19%)      | 5 (21%)      | 1.000        |
| Restrictive                                                                  | 2 (5%)       | 3 (12%)      | 0.341        |
| Lateral E' (cm/s)                                                            | 10.6±2.9     | 9.4±3.6      | 0.141        |
| With Triphasic LV filling                                                    | 10 (23%)     | 5 (20%)      | 1.000        |

| <b>Supplementary Table 4</b>                                                                  | <b>TNNT2</b> | <b>TNNI3</b> |              |
|-----------------------------------------------------------------------------------------------|--------------|--------------|--------------|
| <b>Comparison between patients with TNNT2 and TNNI3 mutations (outcome)</b>                   | n=43         | n=24         | P Value      |
| Follow up (years)                                                                             | 4.8 ± 2.4    | 4.7 ± 2.8    | 0.878        |
| <b>Clinical Outcomes</b>                                                                      |              |              |              |
| HCM related death                                                                             | 1 (2%)       | 1 (4%)       | 1.000        |
| Heart failure-related                                                                         | 0 (0%)       | 1 (4%)       | 0.358        |
| Sudden-unexpected                                                                             | 1 (2%)       | 0 (0%)       | 0.452        |
| Resuscitated cardiac arrest /appropriate ICD shocks                                           | 3 (7%)       | 1 (4%)       | 0.442        |
| Total with malignant arrhythmias *                                                            | 5 (11%)      | 3 (12%)      | 0.642        |
| Nonfatal stroke                                                                               | 1 (2%)       | 1 (4%)       | 1.000        |
| <b>NYHA functional class at final evaluation</b>                                              |              |              |              |
| I                                                                                             | 24 (56%)     | 9 (37%)      | 0.204        |
| II                                                                                            | 12 (28%)     | 10 (42%)     | 0.250        |
| III/IV                                                                                        | 7 (16%)      | 5 (21%)      | 0.743        |
| With progression to NYHA class III or IV                                                      | 6 (13%)      | 4 (16%)      | 0.737        |
| <b>Final echocardiographic evaluation</b>                                                     |              |              |              |
| LV Ejection fraction (%)                                                                      | 60±14        | 58±8         | 0.523        |
| With LV Ejection fraction <50%                                                                | 7 (16%)      | 5 (21%)      | 0.743        |
| <b>LV filling pattern</b>                                                                     |              |              |              |
| Normal                                                                                        | 9 (21%)      | 5 (21%)      | 1.000        |
| Impaired relaxation                                                                           | 12 (28%)     | 4 (17%)      | 0.379        |
| Pseudo-normalized                                                                             | 18 (42%)     | 8 (33%)      | 0.604        |
| Restrictive                                                                                   | 4 (9%)       | 7 (29%)      | <b>0.046</b> |
| Adverse remodelling (progression to LV ejection fraction <50% and/ or restrictive LV filling) | 6 (14%)      | 5 (21%)      | 0.505        |
| <b>Interventions</b>                                                                          |              |              |              |
| Implantable cardioverter-defibrillator                                                        | 9 (21%)      | 6 (26%)      | 0.764        |
| Catheter ablation for atrial fibrillation                                                     | 5 (12%)      | 3 (12%)      | 1.000        |
| Alcohol ablation or myectomy                                                                  | 8 (18%)      | 2 (8%)       | 0.311        |
| <b>Pharmacological Therapy</b>                                                                |              |              |              |
| On treatment                                                                                  | 38 (88%)     | 23 (96%)     | 0.408        |
| Beta-blockers                                                                                 | 28 (66%)     | 17 (74%)     | 0.275        |
| Verapamil                                                                                     | 10 (23%)     | 5 (22%)      | 1.000        |
| Amiodarone                                                                                    | 8 (18%)      | 6 (26%)      | 0.547        |
| Disopyramide                                                                                  | 1 (2%)       | 0 (0%)       | 0.452        |
| Diuretics                                                                                     | 9 (21%)      | 8 (35%)      | 0.380        |
| ACE-inhibitors or ARB                                                                         | 12 (28%)     | 9 (39%)      | 0.426        |
| Warfarin                                                                                      | 6 (14%)      | 8 (35%)      | 0.115        |



**Supplementary Figure 1:  
progression to NYHA Class III-IV during follow-up.**

| Covariates                                     | H.R.  | 95,0% CI for H.R. |       | Sig. |
|------------------------------------------------|-------|-------------------|-------|------|
|                                                |       | Lower             | Upper |      |
| Thin Filament mutation                         | 2.162 | 1.038             | 4.506 | .040 |
| Presence of obstruction                        | 4.065 | 1.909             | 8.657 | .000 |
| Comorbidities*                                 | .611  | .288              | 1.296 | .199 |
| Female gender                                  | 1.027 | .526              | 2.006 | .937 |
| History of atrial fibrillation                 | 2.745 | 1.306             | 5.773 | .008 |
| Max wall thickness >30mm                       | 1.725 | .718              | 4.149 | .223 |
| Age at enrollment >50 y                        | 2.049 | .961              | 4.365 | .063 |
| EF<50% and/or restrictive diastole at baseline | 3.198 | 1.396             | 7.328 | .006 |

\*=chronic obstructive pulmonary disease, diabetes, coronary artery disease

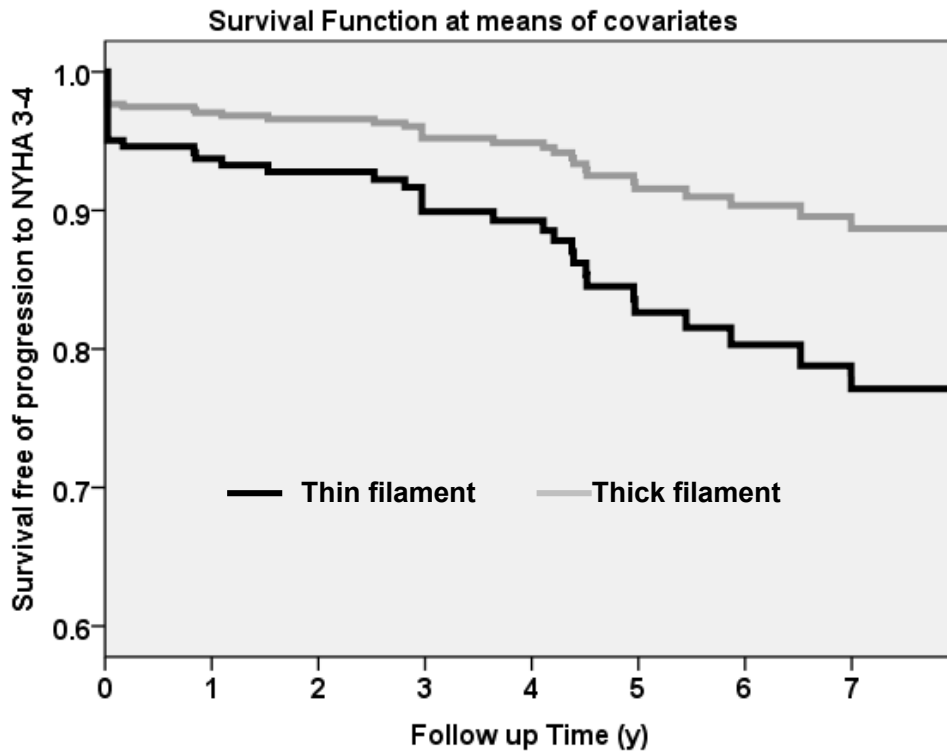

**Legend. Upper panel: outcome of Cox analysis (outcome parameter: progression to NYHA Class III/IV during follow-up), showing hazard ratios (H.R.), 95% confidence intervals of H.R. and significance (Sig.) for a number of covariates evaluated at the first visit. Lower Panel: Estimated survival curves for thin and thick filament patients at means of all other covariates. Notably, the difference between the two cohorts is still clearly significant.**

## Supplementary Figure 2: Adverse LV remodeling during follow-up

| Covariates                     | H.R.  | 95,0% CI for H.R. |       | Sig. |
|--------------------------------|-------|-------------------|-------|------|
|                                |       | Lower             | Upper |      |
| Thin Filament mutation         | 2.277 | 1.169             | 4.437 | .016 |
| Presence of obstruction        | .475  | .171              | 1.324 | .155 |
| Comorbidities*                 | 1.562 | .776              | 3.142 | .211 |
| Female gender                  | 2.079 | 1.069             | 4.043 | .031 |
| History of atrial fibrillation | 2.329 | 1.125             | 4.822 | .023 |
| Max wall thickness >30mm       | .124  | .016              | .933  | .043 |
| Age at enrollment >50 y        | 1.018 | .513              | 2.019 | .959 |
| NYHA Class 3 or 4              | 2.694 | 1.029             | 7.057 | .044 |

\*=chronic obstructive pulmonary disease, diabetes, coronary artery disease

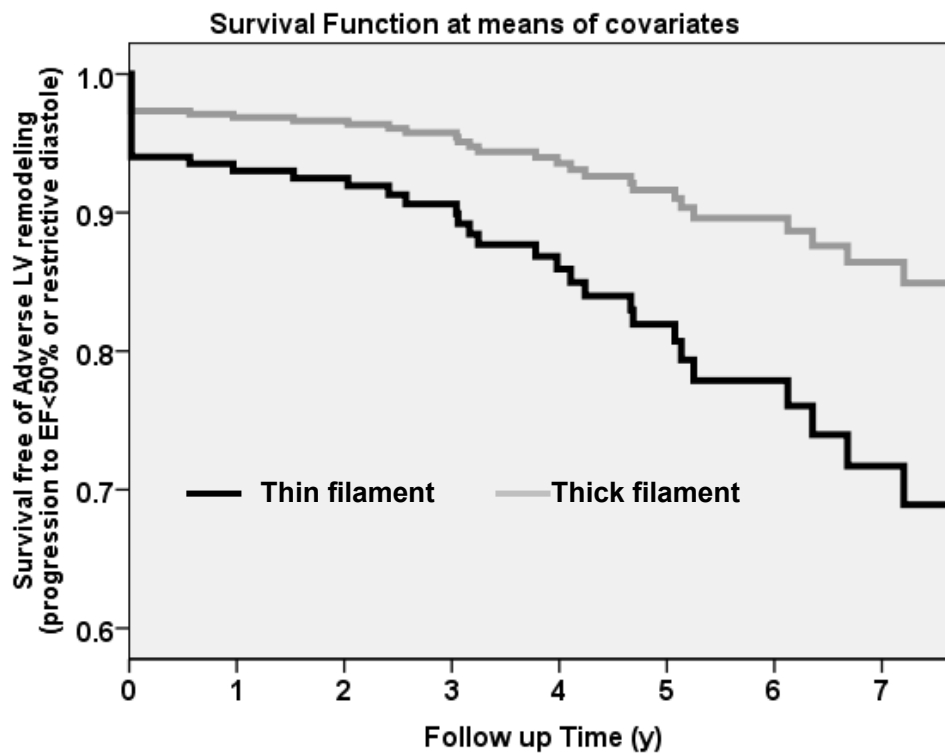

Legend. Upper panel: outcome of Cox analysis (outcome parameter: occurrence of adverse LV remodeling, i.e. progression to ejection fraction <50% or restrictive diastole, during follow-up), showing hazard ratios (H.R.), 95% confidence intervals of H.R. and significance (Sig.) for a number of covariates evaluated at the first visit. Lower Panel: Estimated survival curves for thin and thick filament patients at means of all other covariates. Notably, the difference between the two cohorts is still clearly significant.

### Supplementary Figure 3: Lifetime occurrence of Adverse LV remodeling (cross-sectional)

| Covariates              | H.R.  | 95,0% CI for H.R. |       | Sig. |
|-------------------------|-------|-------------------|-------|------|
|                         |       | Lower             | Upper |      |
| Thin Filament mutation  | 2.792 | 1.483             | 5.257 | .001 |
| Comorbidities*          | 1.344 | .710              | 2.544 | .364 |
| Female gender           | 1.762 | .925              | 3.355 | .085 |
| Familial history of HCM | .870  | .448              | 1.692 | .682 |
| Familial history of SCD | 1.063 | .509              | 2.218 | .871 |

\*=chronic obstructive pulmonary disease, diabetes, coronary artery disease

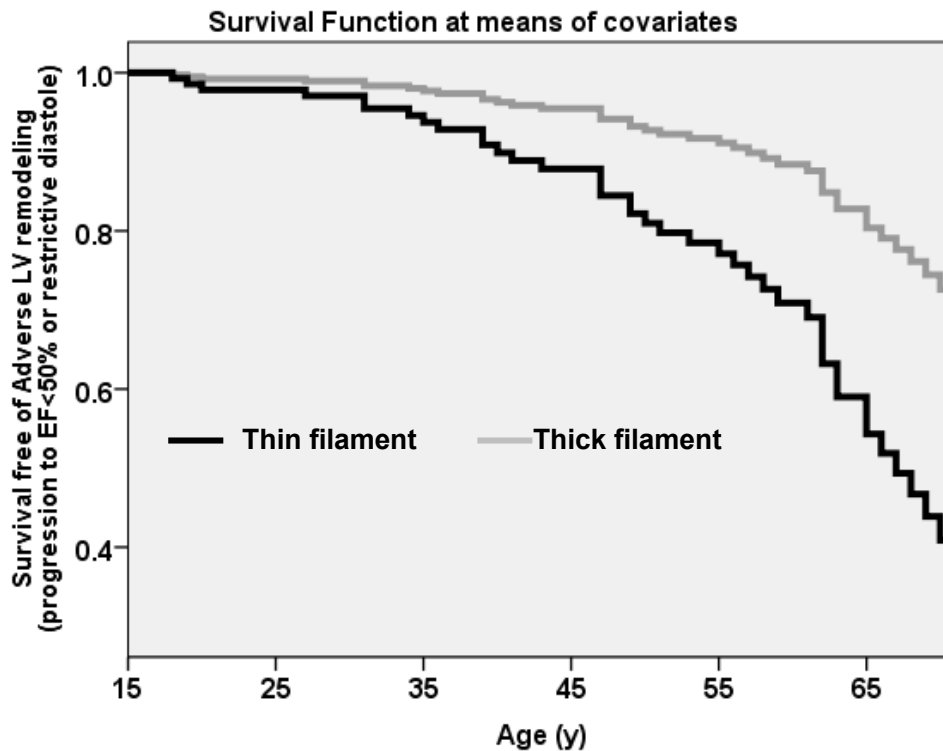

Legend. Upper panel: outcome of Cox analysis (outcome parameter: cross-sectional lifetime occurrence of LV adverse remodeling, i.e. progression to ejection fraction <50% or restrictive diastole), showing hazard ratios (H.R.), 95% confidence intervals of H.R. and significance (Sig.) for a number of covariates evaluated at the first visit. Lower Panel: Estimated survival curves for thin and thick filament patients at means of all other covariates. Notably, the difference between the two cohorts is still clearly significant.
